# Supplementary material for: More comprehensively measuring quality of life in life-threatening illness: the McGill Quality of Life Questionnaire – Expanded
Source: PubMed Central journal article supplement (PMC6823967; doi:10.1186/s12904-019-0473-y), 2019-10-31
Supplement: 12904_2019_473_MOESM1_ESM.pdf [file 12904_2019_473_MOESM1_ESM.pdf]

The following ethics committees and hospitals in Canada approved the original studies that collected the data used in this report. Some do not have study numbers, because some studies were conducted when and where studies were identified by title only or when such detailed information was not required for publication and was therefore not retained.

*Dataset E*

Biomedical Research Ethics Committee, Jewish General Hospital, Montreal, Quebec #09-084

*Dataset F*

Queen's University Health Sciences & Affiliated Teaching Hospitals Research Ethics Board #DMED-1029-07

St. Joseph's Hospital Research Ethics Board (Hamilton, Ontario)

Dalhousie University Health Sciences Research Ethics Board

University of Alberta Health Research Ethics Board

University of British Columbia Behavioural Research Ethics Board

Comité d'éthique de la recherche, Hôpital Maisonneuve-Rosemont

*Dataset G*

McGill University Faculty of Medicine Institutional Review Board #A08-B32-01B,

- Research Ethics Committee, Jewish General Hospital (central review by McGill)
- McGill University Health Centre #97-004 (central review by McGill)

Sisters of Charity of Ottawa (SCO) Health Service research Ethics Board

The Ottawa Hospital Research Ethics Board #2001503-01H

Queen's University Health Sciences & Affiliated Teaching Hospitals Research Ethics Board #ONGY-251-04

University of British Columbia Behavioural Research Ethics Board B01-0668

Interior Health, Central Okanagan, Kelowna General Hospital Institutional Research Review Committee #B01-0668

University of Saskatchewan Research Ethics Board (Behavioural) BSC #01-226
